# Supplementary material for: Leveraging electronic health records from two hospital systems identifies male infertility-associated comorbidities across time
Source: Commun Med (Lond). 2025 Sep 1;5:380. doi: 10.1038/s43856-025-01071-7 (PMC12402078; doi:10.1038/s43856-025-01071-7)
Supplement: Supplementary file 4 — Supplementary Data 1 [file 43856_2025_1071_MOESM4_ESM.xlsx]

## Sheet: mi_concepts
concept_id	concept_name	domain_id	vocabulary_id	concept_class_id	concept_code
76744	Azoospermia	Condition	SNOMED	Clinical Finding	48188009
194419	Infertility due to oligospermia	Condition	SNOMED	Clinical Finding	71349004
198197	Male infertility	Condition	SNOMED	Clinical Finding	2904007
201354	Infertility due to extratesticular cause	Condition	SNOMED	Clinical Finding	84245004
4129550	Unexplained infertility	Condition	SNOMED	Clinical Finding	237145004
4138607	Azoospermia due to systemic disease	Condition	SNOMED	Clinical Finding	425793006
4141809	Azoospermia due to obstruction	Condition	SNOMED	Clinical Finding	427121008
4142110	Azoospermia due to drug	Condition	SNOMED	Clinical Finding	427670006
4143116	Azoospermia disorder	Condition	SNOMED	Clinical Finding	425558002
4302062	Obstruction of efferent duct of testis	Condition	SNOMED	Clinical Finding	418499009
37016334	Azoospermia caused by radiation	Condition	SNOMED	Clinical Finding	366981000119102
37018855	Azoospermia due to infectious disease	Condition	SNOMED	Clinical Finding	366971000119100

## Sheet: vasectomy_concepts
concept_id	concept_name	domain_id	vocabulary_id	concept_class_id	concept_code
605359	Reversal of vasectomy of left vas deferens	Procedure	SNOMED	Procedure	1052350008
605360	Reversal of vasectomy of right vas deferens	Procedure	SNOMED	Procedure	1052351007
605513	Segmental excision and ligation of right vas deferens	Procedure	SNOMED	Procedure	1119338001
605568	Segmental excision and ligation of left vas deferens	Procedure	SNOMED	Procedure	1119337006
606843	Robot-assisted vasovasostomy	Procedure	SNOMED	Procedure	1148704007
606963	Postvasectomy azoospermia	Condition	SNOMED	Clinical Finding	1148912006
2101068	Anesthesia for procedures on male genitalia (including open urethral procedures); vasectomy, unilateral or bilateral	Procedure	CPT4	CPT4	921
2109997	Epididymovasostomy, anastomosis of epididymis to vas deferens; unilateral	Procedure	CPT4	CPT4	54900
2109998	Epididymovasostomy, anastomosis of epididymis to vas deferens; bilateral	Procedure	CPT4	CPT4	54901
2110011	Vasectomy, unilateral or bilateral (separate procedure), including postoperative semen examination(s)	Procedure	CPT4	CPT4	55250
2110013	Vasovasostomy, vasovasorrhaphy	Procedure	CPT4	CPT4	55400
2110014	Ligation (percutaneous) of vas deferens, unilateral or bilateral (separate procedure)	Procedure	CPT4	CPT4	55450
3016064	Spermatozoa [#/area] in Semen by Microscopy high power field --post vasectomy	Measurement	LOINC	Lab Test	12256-4
3016907	Spermatozoa Motile/100 spermatozoa in Semen by Microscopy high power field --post vasectomy	Measurement	LOINC	Lab Test	12257-2
3026831	Spermatozoa [Presence] in Semen by Light microscopy --post vasectomy	Measurement	LOINC	Lab Test	29990-9
3030682	Semen analysis post vasectomy panel	Measurement	LOINC	Lab Test	50677-4
3041553	Spermatozoa [#/volume] in Semen --post vasectomy	Measurement	LOINC	Lab Test	51623-7
4032497	Bilateral epididymovasostomy with anastomosis of epididymis to vas deferens	Procedure	SNOMED	Procedure	1500007
4032596	Stricture of vas deferens post-reversal of vasectomy	Condition	SNOMED	Clinical Finding	236785007
4038314	Semen analysis, post vasectomy	Measurement	SNOMED	Procedure	11743002
4054936	Vasectomy education	Procedure	SNOMED	Procedure	243065005
4060235	Vasectomy failure	Observation	SNOMED	Clinical Finding	169548007
4066149	Bilateral segmental vasectomy and ligation	Procedure	SNOMED	Procedure	17293009
4071951	Microsurgical epididymovasostomy	Procedure	SNOMED	Procedure	176478002
4071954	Non-microsurgical reversal of vasectomy	Procedure	SNOMED	Procedure	176493003
4072179	Reversal of vasectomy	Procedure	SNOMED	Procedure	176490000
4072180	Microsurgical reversal of vasectomy	Procedure	SNOMED	Procedure	176492008
4073857	Non-microsurgical epididymovasostomy	Procedure	SNOMED	Procedure	176479005
4081439	Reversal vasectomy requested	Observation	SNOMED	Context-dependent	184000009
4082225	Vasectomy planned	Observation	SNOMED	Context-dependent	183987000
4086310	Vasectomy requested	Observation	SNOMED	Context-dependent	183997009
4104769	Post-vasectomy epididymal pain	Condition	SNOMED	Clinical Finding	282359006
4117037	Bilateral vasectomy	Procedure	SNOMED	Procedure	287662009
4149971	Post-vasectomy pain	Condition	SNOMED	Clinical Finding	279022005
4150395	Male sterilization using silicon plug	Procedure	SNOMED	Procedure	310488007
4163273	Male sterilization	Procedure	SNOMED	Procedure	399141000
4166215	Bilateral vasectomy including postoperative semen examination	Measurement	SNOMED	Procedure	47655001
4166555	Referral to vasectomy clinic	Observation	SNOMED	Procedure	416457004
4170288	Male castration	Procedure	SNOMED	Procedure	275234001
4170966	Ligation vasectomy	Procedure	SNOMED	Procedure	276486001
4172860	Male sterilization by injection	Procedure	SNOMED	Procedure	276485002
4173165	Riddle crossover vasectomy	Procedure	SNOMED	Procedure	276487005
4311037	Anastomosis of epididymis to vas deferens	Procedure	SNOMED	Procedure	392235000
4318648	Vasovasorrhaphy	Procedure	SNOMED	Procedure	219934001
4329023	Reconstruction of surgically divided vas deferens	Procedure	SNOMED	Procedure	221947009
4330583	Vasectomy	Procedure	SNOMED	Procedure	22523008
35624547	Anastomosis of left epididymis to left vas deferens	Procedure	SNOMED	Procedure	767350003
35624548	Anastomosis of right epididymis to right vas deferens	Procedure	SNOMED	Procedure	767351004
36308147	Post vasectomy	Meas Value	LOINC	Answer	LA19799-8
42739731	Anesthesia for extraperitoneal procedures in lower abdomen, including urinary tract; vasectomy, unilateral/bilateral (Deprecated)	Procedure	CPT4	CPT4	869
44789060	Referral for vasectomy	Observation	SNOMED	Procedure	202181000000104
44789470	Vasectomy scar	Condition	SNOMED	Clinical Finding	203931000000108
44793064	Referral to vasectomy special interest general practitioner	Observation	SNOMED	Procedure	371421000000103
44805420	Referral to community vasectomy service	Observation	SNOMED	Procedure	785741000000109
44808394	Post vasectomy special clearance to stop contraception given	Observation	SNOMED	Context-dependent	858521000000107
45766060	Reversal of sterilization	Procedure	SNOMED	Procedure	703147003
45878991	Vasectomy/tubal ligation/hysterectomy	Meas Value	LOINC	Answer	LA6528-9
45882017	Vasectomy or male sterilization	Meas Value	LOINC	Answer	LA16246-3
45883802	Vasectomy	Meas Value	LOINC	Answer	LA14534-4

## Sheet: legend
column	description
concept_id	OMOP concept id
concept_name	concept name
domain_id	clinical category of concept
vocabulary_id	clinical vocabulary that the concept is from
concept_class_id	clinical category of concept within given vocabulary
concept_code	clinical vocabulary code
