# Supplementary material for: Leveraging electronic health records from two hospital systems identifies male infertility-associated comorbidities across time
Source: Commun Med (Lond). 2025 Sep 1;5:380. doi: 10.1038/s43856-025-01071-7 (PMC12402078; doi:10.1038/s43856-025-01071-7)
Supplement: Supplementary file 15 — Supplementary Data 12 [file 43856_2025_1071_MOESM15_ESM.xlsx]

## Sheet: mi_before_hosp
phenotype	phecode_category
Diseases of pancreas	digestive
Dysuria	genitourinary
Osteoporosis NOS	musculoskeletal
Other diseases of lung	respiratory
Secondary diabetes mellitus	endocrine/metabolic
Vitamin D deficiency	endocrine/metabolic

## Sheet: mi_before_primary_sdoh_hosp
phenotype	phecode_category
Abnormal spermatozoa	genitourinary
Anterior pituitary disorders	None
Cancer of prostate	neoplasms
Decreased libido	mental disorders
Elevated prostate specific antigen [PSA]	genitourinary
Erectile dysfunction [ED]	genitourinary
Hyperplasia of prostate	genitourinary
Hypothyroidism NOS	endocrine/metabolic
Infertility, female	genitourinary
Neutropenia	hematopoietic
Other anemias	hematopoietic
Other disorders of metabolism	endocrine/metabolic
Other disorders of testis	genitourinary
Other ill-defined and unknown causes of morbidity and mortality	None
Pituitary hypofunction	endocrine/metabolic
Sexually transmitted infections (not HIV or hepatitis)	infectious diseases
Testicular hypofunction	endocrine/metabolic
Type 2 diabetes	endocrine/metabolic
Varicose veins	circulatory system

## Sheet: mi_before_sdoh
phenotype	phecode_category
Myeloproliferative disease	neoplasms
Other nonspecific findings on examination of urine	genitourinary

## Sheet: mi_before_sdoh_hosp
phenotype	phecode_category
Abnormal findings examination of lungs	respiratory
Antineoplastic and immunosuppressive drugs causing adverse effects	injuries & poisonings
Osteopenia or other disorder of bone and cartilage	musculoskeletal

## Sheet: con_before_primary
phenotype	phecode_category
Abdominal pain	symptoms
Acquired absence of organs	None
Acute bronchospasm	respiratory
Alcohol-related disorders	mental disorders
Ankylosis of joint	musculoskeletal
Arthropathy NOS	musculoskeletal
Articular cartilage disorder	musculoskeletal
Attention deficit hyperactivity disorder	mental disorders
Cellulitis and abscess of trunk	dermatologic
Complication of internal orthopedic device	injuries & poisonings
Complications of transplants and reattached limbs	injuries & poisonings
Congenital osteodystrophies	congenital anomalies
Conjunctivitis, infectious	sense organs
Degeneration of intervertebral disc	musculoskeletal
Dislocation	injuries & poisonings
Fracture of hand or wrist	injuries & poisonings
Insomnia	neurological
Internal derangement of knee	injuries & poisonings
Malaise and fatigue	symptoms
Nonspecific chest pain	circulatory system
Nonspecific elevation of levels of transaminase or lactic acid dehydrogenase [LDH]	digestive
Obesity	endocrine/metabolic
Other disorders of bone and cartilage	musculoskeletal
Other disorders of male genital organs	genitourinary
Other disorders of soft tissues	musculoskeletal
Other disorders of synovium, tendon, and bursa	musculoskeletal
Other inflammatory disorders of male genital organs	genitourinary
Otitis externa	sense organs
Pain, swelling or discharge of eye	sense organs
Scar conditions and fibrosis of skin	dermatologic
Sciatica	symptoms
Skull and face fracture and other intercranial injury	injuries & poisonings
Sleep apnea	neurological
Stiffness of joint	musculoskeletal
Thoracic or lumbosacral neuritis or radiculitis, unspecified	symptoms

## Sheet: con_before_primary_hosp
phenotype	phecode_category
Actinic keratosis	dermatologic
Contact dermatitis and other eczema due to plants [except food]	dermatologic

## Sheet: con_before_primary_sdoh
phenotype	phecode_category
Acute bronchitis and bronchiolitis	respiratory
Asthma with exacerbation	respiratory
Astigmatism	sense organs
Atopic/contact dermatitis due to other or unspecified	dermatologic
Cervicalgia	symptoms
Cough	respiratory
Displacement of intervertebral disc	musculoskeletal
Eustachian tube disorders	sense organs
Fasciitis	musculoskeletal
Hearing loss	sense organs
Hyperlipidemia	endocrine/metabolic
Influenza	respiratory
Intestinal disaccharidase deficiencies and disaccharide malabsorption	endocrine/metabolic
Myopia	sense organs
Other dyspnea	respiratory
Other upper respiratory disease	respiratory
Sensorineural hearing loss	sense organs
Septal Deviations/Turbinate Hypertrophy	respiratory
Suppurative and unspecified otitis media	sense organs
Viral infection	infectious diseases

## Sheet: con_before_primary_sdoh_hosp
phenotype	phecode_category
Acute pain	neurological
Acute pharyngitis	respiratory
Acute sinusitis	respiratory
Acute upper respiratory infections of multiple or unspecified sites	respiratory
Allergic rhinitis	respiratory
Anxiety disorder	mental disorders
Asthma	respiratory
Back pain	symptoms
Benign neoplasm of skin	neoplasms
Chronic pain	neurological
Chronic sinusitis	respiratory
Contusion	injuries & poisonings
Dermatophytosis of nail	infectious diseases
Disorder of skin and subcutaneous tissue NOS	dermatologic
Disturbance of skin sensation	dermatologic
Enthesopathy	musculoskeletal
Fracture of ankle and foot	injuries & poisonings
Fracture of lower limb	injuries & poisonings
Fracture of tibia and fibula	injuries & poisonings
Generalized anxiety disorder	mental disorders
Genu valgum or varum (acquired)	musculoskeletal
Hemangioma of skin and subcutaneous tissue	neoplasms
Hemorrhoids	circulatory system
Hypersomnia	neurological
Injury, NOS	None
Joint/ligament sprain	injuries & poisonings
Lipoma of skin and subcutaneous tissue	neoplasms
Major depressive disorder	mental disorders
Migraine	neurological
Neoplasm of uncertain behavior of skin	neoplasms
Nevus, non-neoplastic	neoplasms
Obstructive sleep apnea	neurological
Orchitis and epididymitis	genitourinary
Osteoarthrosis, localized, primary	musculoskeletal
Otalgia	sense organs
Other derangement of joint	musculoskeletal
Other dyschromia	dermatologic
Pain in joint	musculoskeletal
Pain in limb	symptoms
Palpitations	circulatory system
Peripheral enthesopathies and allied syndromes	musculoskeletal
Sebaceous cyst	dermatologic
Seborrheic keratosis	dermatologic
Sprains and strains	injuries & poisonings
Symptoms and disorders of the joints	musculoskeletal
Symptoms of the muscles	symptoms
Syncope and collapse	symptoms
Synovitis and tenosynovitis	musculoskeletal
Viral warts & HPV	infectious diseases

## Sheet: con_before_sdoh
phenotype	phecode_category
Hyperglyceridemia	endocrine/metabolic
Impaired fasting glucose	endocrine/metabolic
