# Supplementary material for: Leveraging electronic health records from two hospital systems identifies male infertility-associated comorbidities across time
Source: Commun Med (Lond). 2025 Sep 1;5:380. doi: 10.1038/s43856-025-01071-7 (PMC12402078; doi:10.1038/s43856-025-01071-7)
Supplement: Supplementary file 26 — Supplementary Data 23 [file 43856_2025_1071_MOESM26_ESM.xlsx]

## Sheet: mi_b4_vs_aft_b4
phenotype	phecode_category
Cancer of prostate	neoplasms
Decreased libido	mental disorders
Erectile dysfunction [ED]	genitourinary
Neutropenia	hematopoietic
Other disorders of metabolism	endocrine/metabolic
Pituitary hypofunction	endocrine/metabolic
Sexually transmitted infections (not HIV or hepatitis)	infectious diseases

## Sheet: mi_b4_vs_aft_aft
phenotype	phecode_category
Abnormal electrocardiogram [ECG] [EKG]	circulatory system
Atrial fibrillation	circulatory system
Atrial flutter	circulatory system
Coronary atherosclerosis	circulatory system
Essential hypertension	circulatory system
Hypertensive chronic kidney disease	circulatory system
Nonspecific chest pain	circulatory system
Tachycardia NOS	circulatory system
Atopic/contact dermatitis due to other or unspecified	dermatologic
Disturbance of skin sensation	dermatologic
Anal and rectal conditions	digestive
Cholelithiasis	digestive
Flatulence	digestive
Other chronic nonalcoholic liver disease	digestive
Other disorders of liver	digestive
Hyperlipidemia	endocrine/metabolic
Hypovolemia	endocrine/metabolic
Intestinal disaccharidase deficiencies and disaccharide malabsorption	endocrine/metabolic
Other abnormal glucose	endocrine/metabolic
Type 2 diabetes with neurological manifestations	endocrine/metabolic
Type 2 diabetes with renal manifestations	endocrine/metabolic
Vitamin B-complex deficiencies	endocrine/metabolic
Vitamin D deficiency	endocrine/metabolic
Chronic Kidney Disease, Stage III	genitourinary
Frequency of urination and polyuria	genitourinary
Hematuria	genitourinary
Other abnormality of urination	genitourinary
Retention of urine	genitourinary
Elevated white blood cell count	hematopoietic
Iron deficiency anemias, unspecified or not due to blood loss	hematopoietic
Thrombocytopenia	hematopoietic
Osteoporosis NOS	musculoskeletal
Pain in joint	musculoskeletal
Inflammatory and toxic neuropathy	neurological
Insomnia	neurological
Other headache syndromes	neurological
Other tests	None
Acute upper respiratory infections of multiple or unspecified sites	respiratory
Allergic rhinitis	respiratory
Asthma	respiratory
Cough	respiratory
Influenza	respiratory
Other diseases of lung	respiratory
Pleurisy; pleural effusion	respiratory
Pulmonary collapse; interstitial and compensatory emphysema	respiratory
Solitary pulmonary nodule	respiratory
Voice disturbance	respiratory
Wheezing	respiratory
Astigmatism	sense organs
Cataract	sense organs
Disorders of vitreous body	sense organs
Dry eyes	sense organs
Glaucoma	sense organs
Senile cataract	sense organs
Abdominal pain	symptoms
Back pain	symptoms
Cervicalgia	symptoms
Edema	symptoms
Fever of unknown origin	symptoms
Malaise and fatigue	symptoms
Myalgia and myositis unspecified	symptoms
Other abnormal blood chemistry	symptoms

## Sheet: mi_b4_vs_aft_b4_aft
phenotype	phecode_category
Abnormal spermatozoa	genitourinary
Elevated prostate specific antigen [PSA]	genitourinary
Hyperplasia of prostate	genitourinary
Hypothyroidism NOS	endocrine/metabolic
Other anemias	hematopoietic
Other disorders of testis	genitourinary
Other ill-defined and unknown causes of morbidity and mortality	None
Testicular hypofunction	endocrine/metabolic
Type 2 diabetes	endocrine/metabolic
Varicose veins	circulatory system
